# Supplementary material for: Targeted microRNA delivery by lipid nanoparticles and gas vesicle-assisted ultrasound cavitation to treat heart transplant rejection
Source: Royal Society of Chemistry journal article supplement (doi:10.1039/d2bm02103j), 2023-01-01
Supplement: d2bm02103j1.pdf [file d2bm02103j1.pdf]

# Targeted microRNA delivery by lipid nanoparticles and gas vesicles-assisted ultrasound cavitation to treat heart transplant rejection

Rui Wang <sup>a,b,c#</sup>, Luyang Yi <sup>a,b,c#</sup>, Wuqi Zhou <sup>a,b,c</sup>, Wenyuan Wang <sup>a,b,c</sup>, Lufang Wang <sup>a,b,c</sup>,  
Lingling Xu <sup>a,b,c</sup>, Cheng Deng <sup>a,b,c</sup>, Mengrong He <sup>a,b,c</sup>, Yuji Xie <sup>a,b,c</sup>, Jia Xu <sup>a,b,c</sup>, Yihan Chen <sup>a,b,c</sup>,  
Tang Gao <sup>a,b,c</sup>, Qiaofeng Jin <sup>a,b,c\*</sup>, Li Zhang <sup>a,b,c\*</sup> and Mingxing Xie <sup>a,b,c\*</sup>.

<sup>a</sup>Department of Ultrasound Medicine, Union Hospital, Tongji Medical College, Huazhong  
University of Science and Technology, Wuhan 430022, China;

<sup>b</sup>Hubei Province Clinical Research Center for Medical Imaging, Wuhan 430022, China;

<sup>c</sup>Hubei Province Key Laboratory of Molecular Imaging, Wuhan 430022, China;

E-mail addresses: xiemx@hust.edu.cn (M. Xie), zli429@hust.edu.cn (L. Zhang),

jin\_qf@hust.edu.cn (Q. Jin)

\*Corresponding author. 1277 Jiefang Avenue, Wuhan 430022, China.

# These authors contributed equally to this work.

**Table S1.** The characterization of the GVs (mean  $\pm$  SD).

|     | mean diameter (nm) | zeta potential (mV) | PDI             |
|-----|--------------------|---------------------|-----------------|
| GVs | 174.80 $\pm$ 2.20  | -24.47 $\pm$ 3.26   | 0.03 $\pm$ 0.02 |

PDI, polydispersity index. n=5

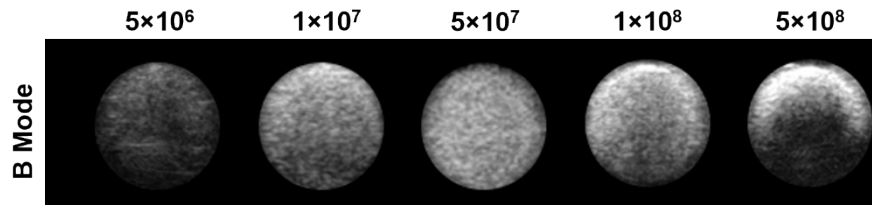

**Figure S1.** Ultrasound images of a phantom containing GVs at the concentration ranging from  $5 \times 10^6$ / mL to  $5 \times 10^8$ / mL.

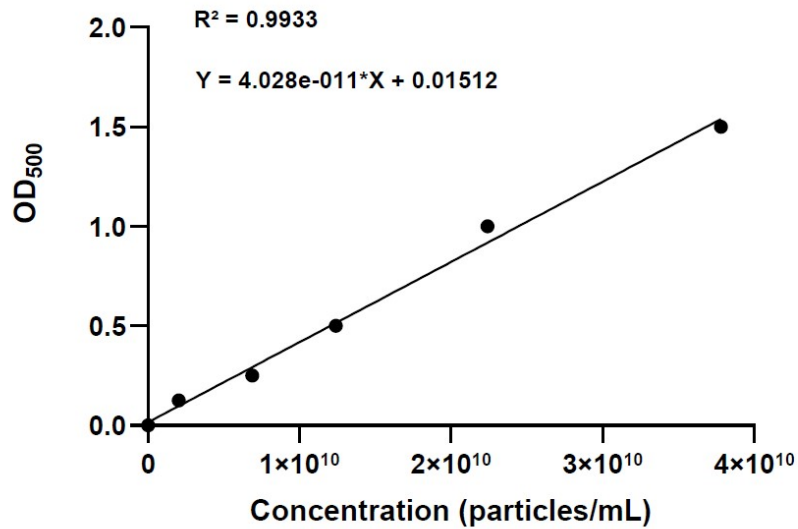

**Figure S2.** The relationship between concentration and OD<sub>500</sub> of GVs.

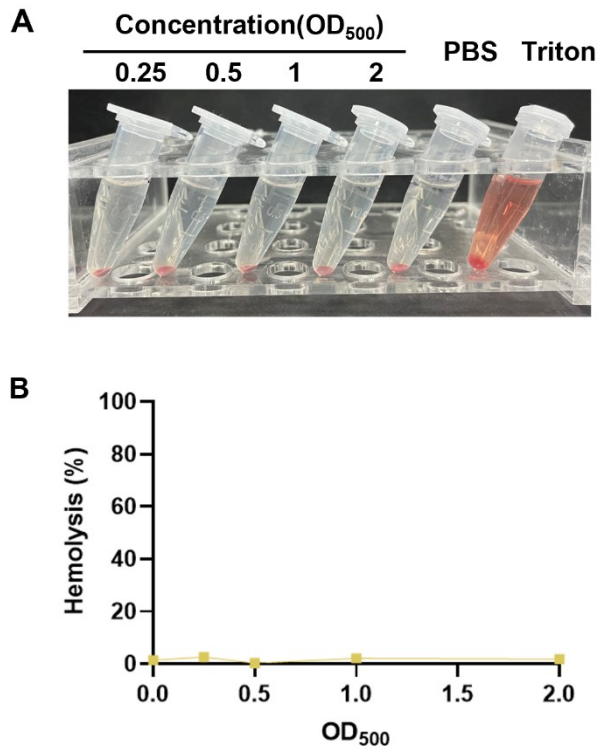

**Figure S3.** Photograph (A) and hemolysis percentage (B) of RBCs after treated with different concentrations of GVs, Triton and PBS was applied as positive and negative controls respectively.

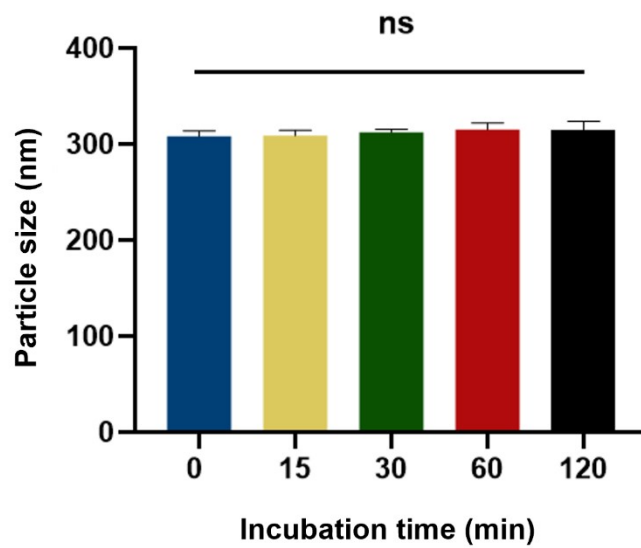

**Figure S4.** Diameter distributions of GVs exposed to serum for 0 min, 15min, 30 min, 60 min and 120 min. Data were presented as mean  $\pm$  SD. n = 3 per group.

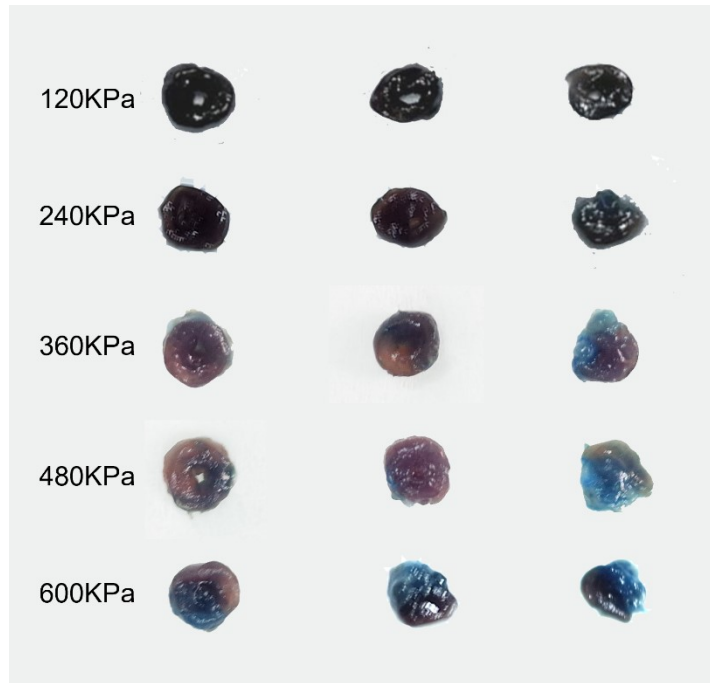

**Figure S5.** Representative photographs of the hearts and changes in EB extravasation. Exposure time = 2 min.

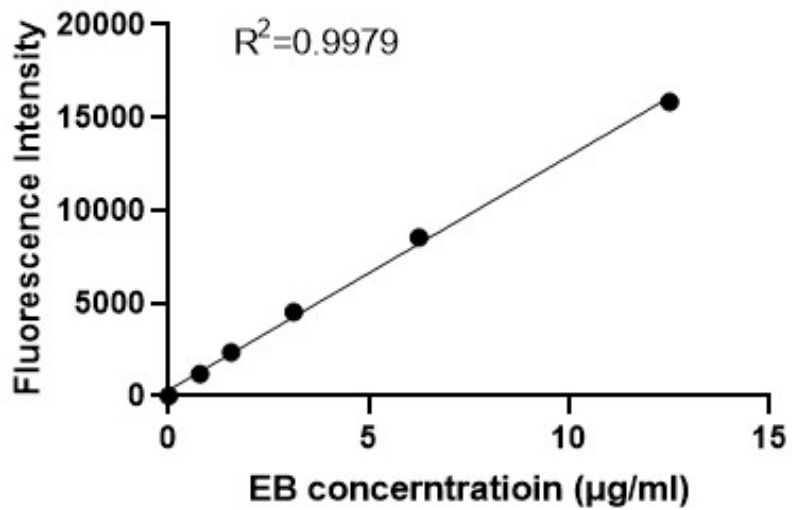

**Figure S6.** Standard curve of EB optical density at the wavelength of 620 nm.

**Table S2.** Hematology parameters in whole blood of HT mice following the treatment of LIPUS for 24 h. All data represent mean  $\pm$  SD, n = 3.

| Hematologic Parameters                          | Isograft           | Reference |
|-------------------------------------------------|--------------------|-----------|
| White blood cell ( $10^9/L$ )                   | $1.53 \pm 0.45$    | 0.8-6.8   |
| Lymphocytes ( $10^9/L$ )                        | $0.83 \pm 0.37$    | 0.7-5.7   |
| Monocytes ( $10^9/L$ )                          | $0.10 \pm 0.00$    | 0.0-0.3   |
| Neutrophil( $10^9/L$ )                          | $0.6 \pm 0.08$     | 0.1-1.8   |
| Lymphocytes (%)                                 | $69.43 \pm 9.55$   | 55.8-90.6 |
| Red blood cell ( $10^{12}/L$ )                  | $6.63 \pm 0.84$    | 6.36-9.42 |
| Hemoglobin (g/L)                                | $123.00 \pm 11.23$ | 110-143   |
| Hematocrit (%)                                  | $35.13 \pm 1.90$   | 34.6-44.6 |
| Mean corpuscular volume (fl)                    | $51.50 \pm 1.50$   | 48.2-58.3 |
| Mean corpuscular hemoglobin (pg)                | $15.97 \pm 0.12$   | 15.8-19   |
| Mean corpuscular hemoglobin concentration (g/L) | $324.00 \pm 6.53$  | 302-353   |
| Red blood cell distribution width (%)           | $16.7 \pm 0.45$    | 13-17     |

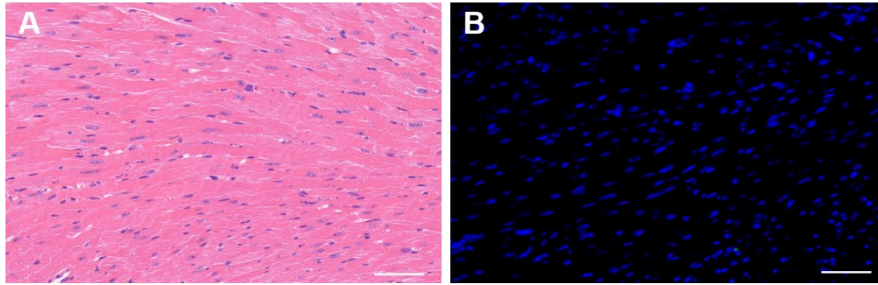

**Figure S7.** Typical H&E staining image (A) and TUNEL imaging (B) of graft heart after treated with LIPUS. There were almost no TUNEL positive (green) nuclei. Scale bar: 50  $\mu$ m.

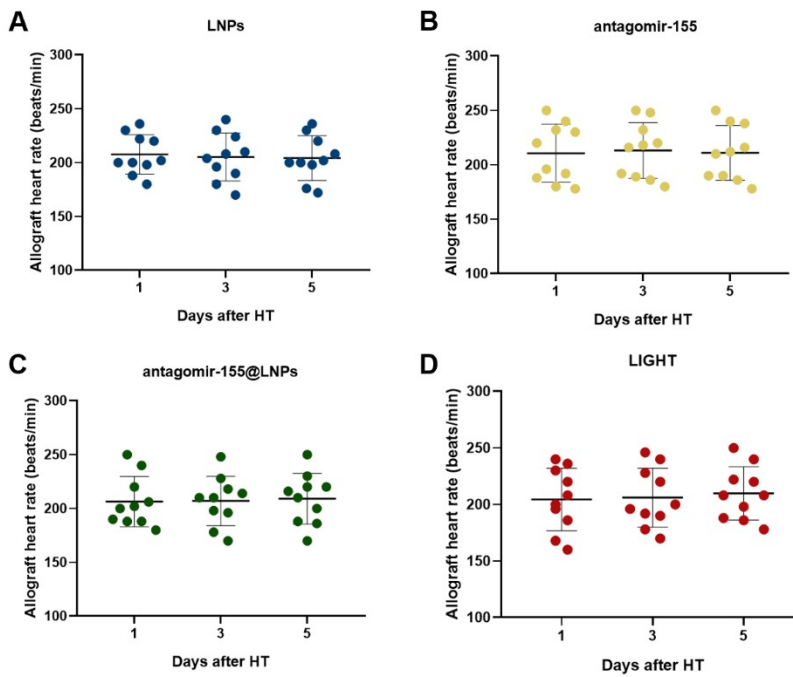

**Figure S8.** Heart rate of mice before each treatment at 1<sup>th</sup>, 3<sup>th</sup>, 5<sup>th</sup> day after HT, each mouse was measured twice. There was no significant change in each group over time.  $p > 0.05$ .  $n = 5$  per group for all analyses. One way ANOVA test was used.

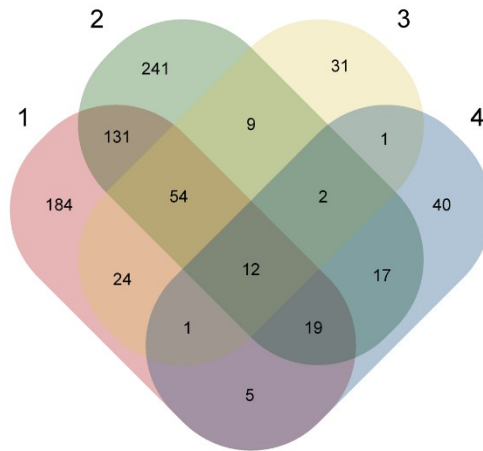

**Figure S9.** The prediction results of miR-155 target genes in the miRDB, TargetScan, PicTar and miRmap databases: the four irregular graphs in the image represented the gene prediction results of the four databases, and the middle part represented the intersection of four database prediction results (Socs1, Astn2, Jarid2, Tspan14, Picalm, Zic3, Hivep2, Csnk1g2, Tbr1, Myb, Rps6ka5, Acta1).

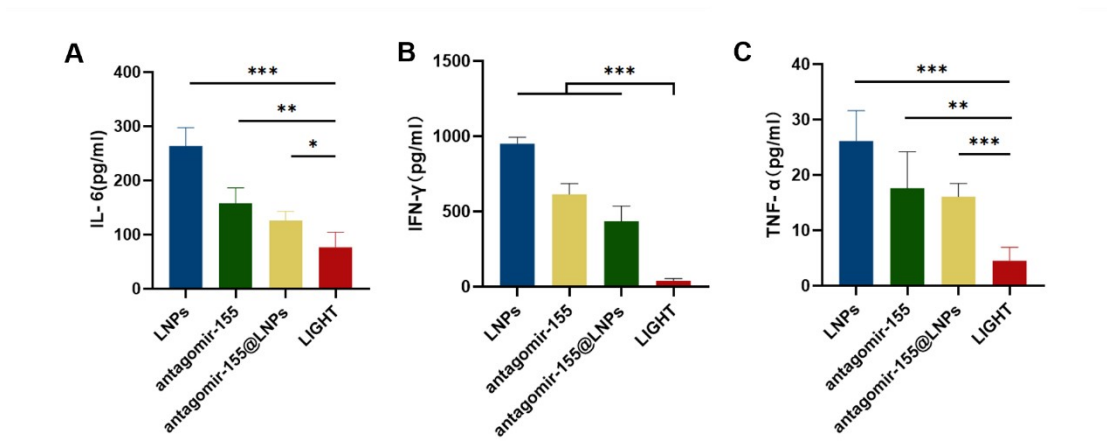

**Figure S10.** Changes in inflammatory cytokines (IL-6, TNF- $\alpha$ , and IFN- $\gamma$ ) expression at the protein levels analyzed by ELISA. \* $p < 0.05$ , \*\* $p < 0.01$ , \*\*\* $p < 0.001$ .  $n = 4$  per group for all analyses. One-way ANOVA test was used.

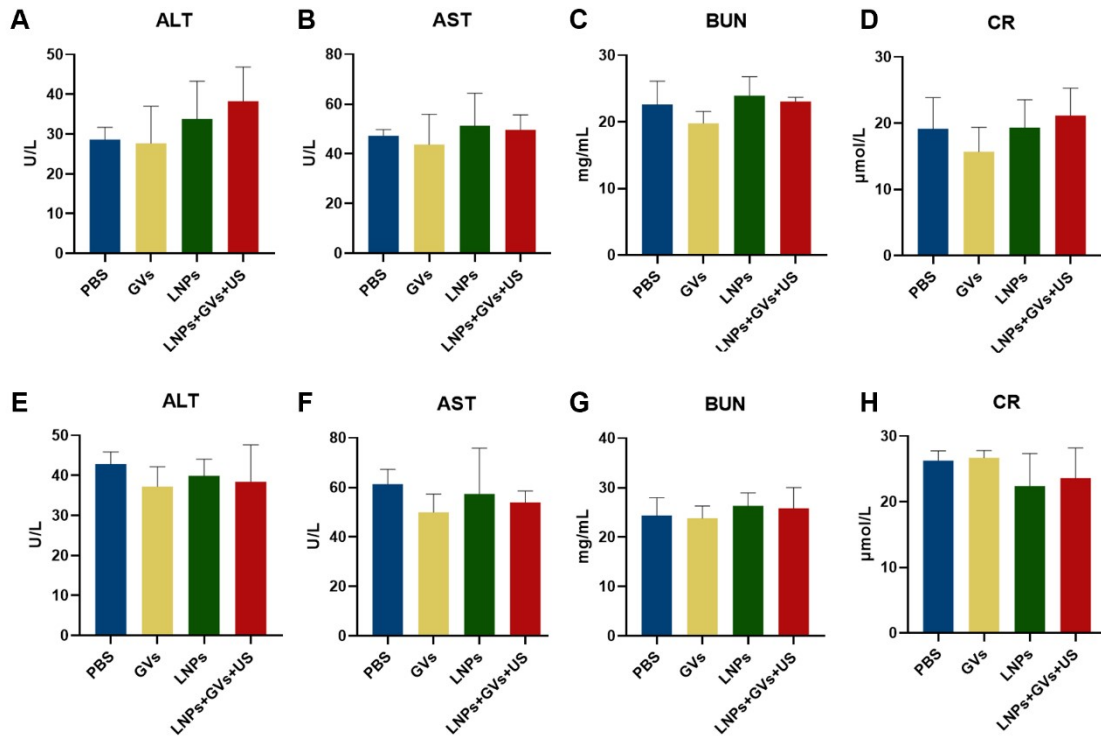

**Figure S11.** *In vivo* liver and kidney functional markers examined in the peripheral blood of mice treated with PBS, GV, LNP, and LNP + GV + US. Serum levels of ALT (A), AST (B), BUN (C) and CR (D) 1 day and 7 days (E-H) after treatment. Data were presented as mean  $\pm$  SD.  $n = 5$  per group.

**Table S3.** Hematology parameters in whole blood of healthy mice following the treatment of PBS, GV, LNP and LNP + GV + US for 7 days. All bars represent mean  $\pm$  SD ( $n = 6$ ).



| Hematologic Parameters                          | PBS              | GVs             | LNPs              | LNPs + GVs + US  | Reference |
|-------------------------------------------------|------------------|-----------------|-------------------|------------------|-----------|
| White blood cell (10 <sup>9</sup> /L)           | 2.37±<br>0.26    | 2.96 ±<br>1.00  | 5.53 ±<br>2.19    | 5.50 ±<br>0.69   | 0.8-6.8   |
| Lymphocytes (10 <sup>9</sup> /L)                | 1.67±<br>0.28    | 2.3 ±<br>0.93   | 4.63 ±<br>1.84    | 4.23 ±<br>0.72   | 0.7-5.7   |
| Monocytes (10 <sup>9</sup> /L)                  | 0.08 ±<br>0.04   | 0.08 ±<br>0.04  | 0.15 ±<br>0.07    | 0.18 ±<br>0.07   | 0.0-0.3   |
| Neutrophil(10 <sup>9</sup> /L)                  | 0.63 ±<br>0.17   | 0.58 ±<br>0.16  | 0.75 ±<br>0.38    | 1.08 ±<br>0.40   | 0.1-1.8   |
| Lymphocytes (%)                                 | 68.65±<br>8.12   | 75.6 ±<br>5.80  | 81.3 ±<br>5.69    | 83.03 ±<br>3.64  | 55.8-90.6 |
| Red blood cell (10 <sup>12</sup> /L)            | 8.80 ±<br>0.51   | 8.14 ±<br>0.45  | 7.68 ±<br>0.65    | 8.50 ±<br>0.54   | 6.36-9.42 |
| Hemoglobin (g/L)                                | 131.50 ±<br>6.70 | 126.5 ±<br>6.99 | 120.5 ±<br>12.04  | 122.17 ±<br>7.40 | 110-143   |
| Hematocrit (%)                                  | 40.60 ±<br>3.02  | 37.78±<br>2.12  | 37.5 ±<br>2.97    | 41.33 ±<br>2.60  | 34.6-44.6 |
| Mean corpuscular volume (fl)                    | 49.15 ±<br>0.82  | 49.45 ±<br>0.66 | 48.93 ±<br>0.44   | 48.7 ±<br>0.96   | 48.2-58.3 |
| Mean corpuscular hemoglobin (pg)                | 15.90 ±<br>0.28  | 16.5 ±<br>0.57  | 15.17 ±<br>0.65   | 16.3 ±<br>0.23   | 15.8-19   |
| Mean corpuscular hemoglobin concentration (g/L) | 324.00 ±<br>8.96 | 334.5 ±<br>9.07 | 313.33 ±<br>14.18 | 315.00 ±<br>5.80 | 302-353   |
| Red blood cell distribution width (%)           | 16.73 ±<br>0.27  | 16.28 ±<br>0.49 | 16.17 ±<br>0.45   | 16.25 ±<br>0.20  | 13-17     |

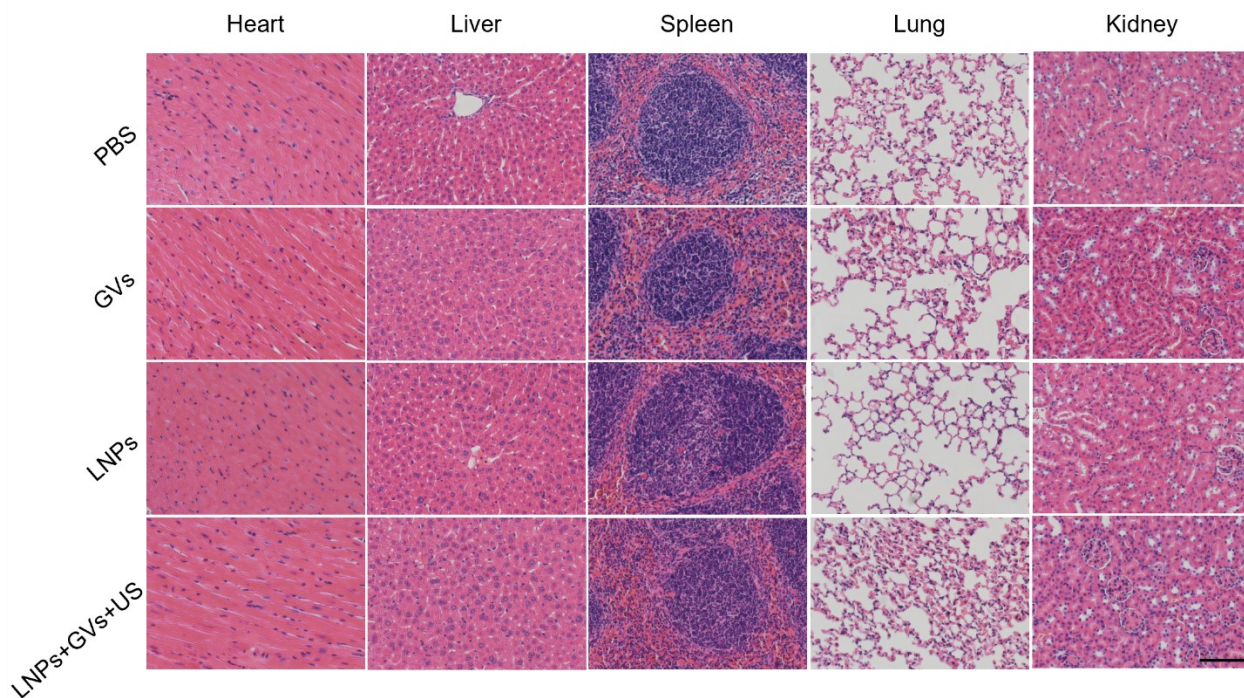

**Figure S12.** *In vivo* toxicity of LIGHT platform. Healthy mice were treated with PBS, GV<sub>s</sub>, LNPs, or LNPs + GV<sub>s</sub> + US, respectively. 7 days after treatment, H&E staining images of major organs including heart, liver, spleen, lung, and kidney were acquired. Scale bar: 100  $\mu$ m.

**Table S4.** The premier sequences used for RT-PCR.

| Gene           | Forward                             | Reverse                                           |
|----------------|-------------------------------------|---------------------------------------------------|
| $\beta$ -actin | AGAGGGAAATCGTGCGTGAC                | CAATAGTGATGACCTGGCCGT                             |
| U6             | CTCGCTTCGGCAGCACA                   | AACGCTTCACGAATTTGCGT                              |
| mmu-miR-155-5p | ACACTCCAGCTGGGTAAATGCT              | CTCAACTGGTGTCGTGGAGTCG                            |
| IL-6           | AATTGTGAT<br>ACACATGTTCTCTGGGAAATCG | GCAATTCAGTTGAGACCCCTAT<br>AAGTGCATCATCGTTGTTTCATC |
| TNF- $\alpha$  | ACTGGCAGAAGAGGCACTC                 | CTGGCACCACTAGTTGGTTG                              |

---

|               |                             |                               |
|---------------|-----------------------------|-------------------------------|
| IFN- $\gamma$ | GGATATCTGGAGCTGGCAA         | TGACCTCAAACCTTGGCAATACT<br>C  |
| iNOS          | AGCTCGGGTTGAAGTGGTATG       | CACAGCCACATTGATCTCCG          |
| IL-1 $\beta$  | GTAATGAAAGACGGCACACCC       | CAGGCTTGTGCTCTGCTTGTG         |
| IL-10         | AATAAGCTCCAAGACCAAGGT<br>GT | CATCATGTATGCTTCTATGCAG<br>TTG |
| Arg1          | GGTGGCAGAGGTCCAGAAGAA       | CCCATGCAGATTCCCAGAGC          |
| SOCS1         | CGAGACCTTCGACTGCCTTT        | GGAGTACCGGGTTAAGAGGGA         |

---
